# Supplementary material for: How Hydrodynamic Phonon Transport Determines the Convergence of Thermal Conductivity in Two-Dimensional Materials
Source: MDPI journal article supplement (doi:10.3390/nano12162854), 2022-08-18
Supplement: s1 [file s1]

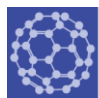

Supporting Information for

# How Hydrodynamic Phonon Transport Determines the Convergence of Thermal Conductivity in Two-Dimensional Materials

Jianhui Jiang, Shuang Lu, Yulou Ouyang and Jie Chen \*

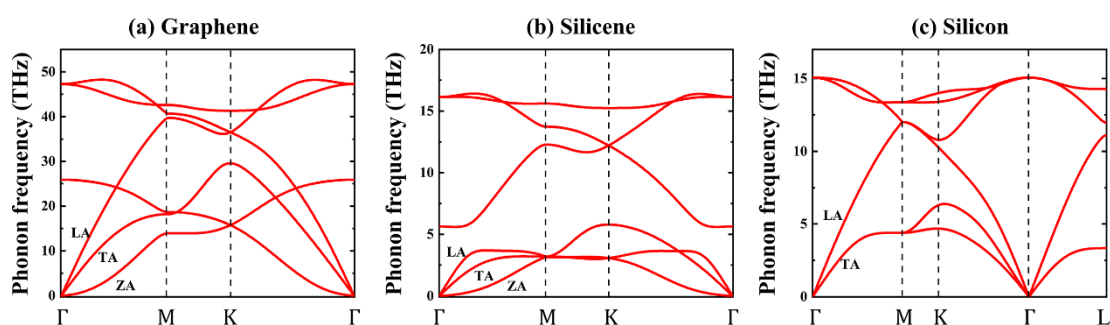

**Figure S1.** The phonon dispersion of (a) graphene, (b) silicene, (c) silicon. ZA, TA and LA branches are marked. The quadratic dispersion of ZA mode is only observed in 2D system.

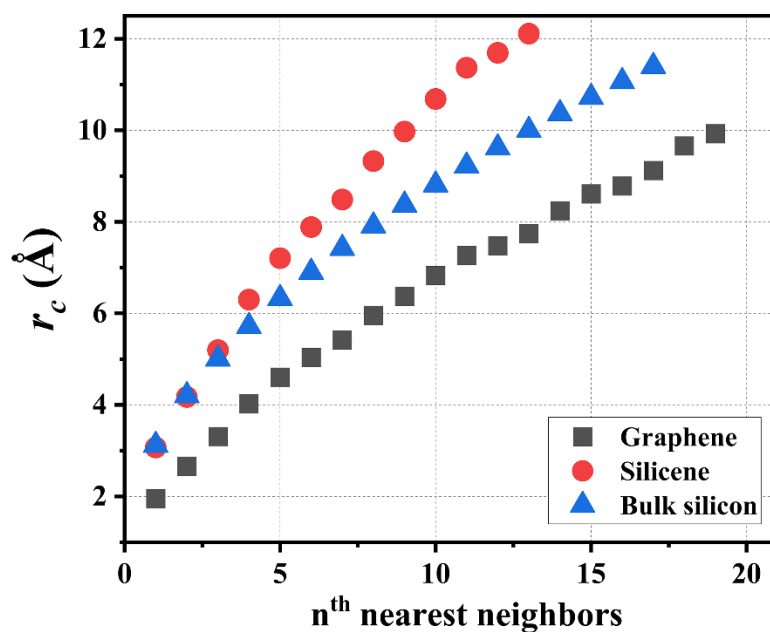

**Figure S2.** The corresponding cutoff radius ( $r_c$ ) to the  $n^{\text{th}}$  nearest neighbors (NNs) for graphene, silicene, and bulk silicon.
